# Supplementary material
Source: PubMed Central journal article supplement (PMC9494333)
Supplement: eje-20-1391-supplementary_table_1.pdf [file eje-20-1391-supplementary_table_1.pdf]

**Supplemental Table 1:** Thyroid function tests in patients with reduced TSH (median 0.2, range 0.07-0.39 mU/L) at admission. The median time of TSH suppression was 5 days (range 2-9). Blood sampling were done weekly (mean 8±2 days). The last measurement available corresponds to either discharge or death. None of these patients was taking steroids.

| #/sex/age<br>(outcome) | TSH/FT4/FT3<br>at admission | TSH/FT4/FT3 during hospitalization (days) |                         |                       |                                 |                                 |                                 |                                 |
|------------------------|-----------------------------|-------------------------------------------|-------------------------|-----------------------|---------------------------------|---------------------------------|---------------------------------|---------------------------------|
|                        |                             |                                           |                         |                       |                                 |                                 |                                 |                                 |
| 1/M/83 (S)             | 0.12/21.5/2.8               | 0.50/na/na<br>(5)                         | 1.45/na/na<br>(8)       | 1.56/13/2.3<br>(12)   | 1.34/na/na (17)                 | 1.19/16.8/2.9<br>(21)           | 1.88/17.5/3.6<br>(45 discharge) | 1.47/na/na<br>(211)             |
| 2/M/73 (S)             | 0.19/17.3/1.9               | 0.47/na/na<br>(5)                         | 0.77/na/na<br>(9)       | 1.22/20.3/3<br>(14)   | 0.58/15.8/1.5<br>(22)           | 0.91/17.1/2.8<br>(27)           | 0.96/na/na (30)                 | 1.70/20.9/2.9<br>(47 discharge) |
| 3/F/67 (S)             | 0.23/14.3/2.7               | 0.30/15.2/2.9<br>(4)                      | 1.01/na/na<br>(6)       | 1.69/na/na<br>(10)    | 0.71/na/na<br>(13)              | 0.85/na/na (16)                 | 1.07/17.3/3.1<br>(25 discharge) | 1.10/na/na<br>(126)             |
| 4/M/57 (S)             | 0.07/15.5/2.1               | 0.05/16.2/2.2<br>(4)                      | 1.44/na/na<br>(6)       | 2.08/20.1/5.2<br>(14) | 1.11/22.3/5.1<br>(21)           | 1.07/na/na<br>(24)              | 0.93/16.3/5.2<br>(37 discharge) | 1.29/na/na<br>(127)             |
| 5/M/72 (S)             | 0.08/15.3/2.2               | 0.05/11.6/1.5<br>(5)                      | 0.48/na/na<br>(6)       | 1.54/12.5/2.6<br>(10) | 0.84/na/na<br>(14)              | 2.10/19.8/3.6<br>(22)           | 1.02/na/na<br>(45)              | 2.42/21.2/3.5<br>(65 discharge) |
| 6/F/67 (S)             | 0.31/16.6/2.0               | 0.38/na/na<br>(4)                         | 1.02/na/na<br>(5)       | 0.69/na/na<br>(9)     | 0.89/15.3/3.1 (18)              | 1.45/17.3/2.3<br>(28 discharge) |                                 |                                 |
| 7/M/72 (S)             | 0.39/16.3/3.3               | 0.34/na/na<br>(2)                         | 0.63/na/na<br>(3)       | 0.77/na/na<br>(7)     | 1.17/15.4/3.1<br>(14 discharge) | 0.77/na/na<br>(175)             |                                 |                                 |
| 8/F/65 (S)             | 0.37/na/na                  | 0.18/na/na<br>(4)                         | 0.05/18.2/2.9<br>(6)    | 0.87/na/na<br>(9)     | 1.50/19.3/4.4<br>(11 discharge) |                                 |                                 |                                 |
| 9/M/68 (D)             | 0.30/14.2/1.9               | 0.41/13.2/2.0<br>(2 death)                |                         |                       |                                 |                                 |                                 |                                 |
| 10/M/89 (D)            | 0.14/19.7/2.6               | 0.09/18.7/2.9<br>(4)                      | 0.05/na/na<br>(6 death) |                       |                                 |                                 |                                 |                                 |
| 11/M/83 (D)            | 0.30/15.2/2.0               | 0.48/15.6/2.5<br>(3)                      | 0.74/na/na<br>(7)       | 1.87/14.9/2.1<br>(14) | 1.51/13.6/2.0<br>(26 death)     |                                 |                                 |                                 |
| 12/M/70 (D)            | 0.09/16.9/4.4               | 0.13/15.7/2.8<br>(2)                      | 0.19/16.3/2.5<br>(6)    | 0.49/na/na<br>(10)    | 1.82/na/na<br>(12)              | 2.10/14.9/1.9<br>(14 death)     |                                 |                                 |

Legend: FU= follow-up; na= not assessed; NG= nodular goiter; TSH reference range 0.4-5.0 mU/L; FT4 reference range = 11.5-24.5 pmol/l; FT3 reference range = 2.9-7.1 pmol/l, Tg (thyroglobulin) reference range <85 µg/L, D= deceased; S= survivor; CT= computed tomography.
