# Supplementary material
Source: PubMed Central journal article supplement (PMC9494333)
Supplement: eje-20-1391-supplementary_table_2.pdf [file eje-20-1391-supplementary_table_2.pdf]

**Supplemental Table 2:** Thyroid function tests in the 27 patients with normal TSH at baseline and showing a reduced TSH during hospitalization. The median time of TSH suppression was 5 days (range 2-9). Blood sampling were done weekly (mean 8±2 days). The last measurement available corresponds to either discharge or death.

| #/sex/age<br>(duration of<br>TSH decline ) | TSH/FT4/FT3<br>at admission | TSH/FT4/FT3 during hospitalization (days) |                      |                       |                        |                        |                        |                        |
|--------------------------------------------|-----------------------------|-------------------------------------------|----------------------|-----------------------|------------------------|------------------------|------------------------|------------------------|
|                                            |                             |                                           |                      |                       |                        |                        |                        |                        |
| #1/M/46 (S)                                | 0.94/14.2/3.0               | 0.23/na/na<br>(2)                         | 0.16/11.2/2.2<br>(5) | 0.76/na/na<br>(6)     | 2.36/13.4/2.7<br>(12)  | 2.29/23.7/3.3<br>(21)  | 2.27/15.9/4.5<br>(33)§ | 2.23/16.8/4.8<br>(153) |
| #2/F/67 (S)                                | 0.54/18.5/2.5               | 3.12/16.7/2.7<br>(6)                      | 0.18/na/na<br>(9)    | 0.29/17.2/2.5<br>(11) | 0.48/na/na<br>(12)     | 1.22/16.8/3.1 (20)     | 1.82/16.1/3.2<br>(31)  | 1.01/17.5/4<br>(48)§   |
| #3/M/84 (S)                                | 0.41/17.3/2.9               | 0.27/na/na<br>(2)                         | 0.22/na/na<br>(5)    | 0.21/16.2/2.9<br>(9)  | 0.75/na/na<br>(10)     | 0.80/15.3/3.1<br>(21)§ |                        |                        |
| #4/M/61 (S)                                | 0.58/16.3/2.9               | 0.22/na/na<br>(2)                         | 0.19/16.7/2.3<br>(5) | 0.44/na/na<br>(9)     | 1.46/na/na<br>(11)     | 1.61/17.4/3.2<br>(13)§ |                        |                        |
| #5/M/53 (D)                                | 1.48/19.4/2.6               | 0.67/na/na<br>(2)                         | 0.36/na/na<br>(4)    | 0.37/16.5/2.3<br>(6)  | 0.59/na/na<br>(7)      | 1.08/14.3/2.1<br>(12)  |                        |                        |
| #6/M/71 (S)                                | 2.37/15.9/3.1               | 1.49/na/na<br>(2)                         | 0.76/na/na<br>(8)    | 0.26/na/na<br>(10)    | 0.23/16.7/2.9<br>(11)  | 0.89/na/na<br>(12)     | 4.05/17.1/3.3<br>(15)§ | 2.48/na/na<br>(249)    |
| #7/M/67 (D)                                | 1.16/15.6/3.1               | 0.51/na/na<br>(1)                         | 0.35/12.2/2.0<br>(2) | 0.75/na/na<br>(4)     | 0.41/13.1/2.6<br>(8)   | 1.44/14.4/2.9<br>(19)  |                        |                        |
| #8/M/57 (S)                                | 2.05/19.8/3.9               | 1.70/na/na<br>(3)                         | 0.66/na/na<br>(7)    | 0.42/16.6/3.3<br>(13) | 0.07/na/na<br>(14)     | 0.39/13.2/2.9<br>(17)  | 1.49/na/na<br>(18)     | 1.42/15.1/3.2<br>(27)§ |
| #9/M/47 (S)                                | 0.67/15.2/3.2               | 0.23/na/na<br>(2)                         | 0.21/14.4/3.0<br>(4) | 0.54/na/na<br>(7)     | 3.01/17.6/4.1<br>(9)§  |                        |                        |                        |
| #10/M/78 (D)                               | 0.86/14.1/3.1               | 0.53/na/na<br>(4)                         | 0.27/na/na<br>(5)    | 0.12/na/na<br>(6)     | 0.19/12.3/2.9<br>(8)   |                        |                        |                        |
| #11/F/56 (S)                               | 1.08/16.8/3.1               | 1.10/na/na<br>(3)                         | 0.68/na/na<br>(8)    | 0.36/15.9/1.9<br>(9)  | 0.54/na/na<br>(10)     | 1.14/na/na<br>(13)     | 1.87/14.3/3.1<br>(26)§ | 1.9/na/na<br>(110)     |
| #12/M/74 (S)                               | 0.91/17.8/2.7               | 0.36/na/na<br>(5)                         | 0.34/16.4/3.3<br>(7) | 0.47/na/na<br>(9)     | 0.99/na/na<br>(12)     | 1.8/17.2/3.5<br>(14)§  |                        |                        |
| #13/M/58 (S)                               | 1.47/19.2/4.2               | 1.84/na/na<br>(3)                         | 0.29/17.5/3.2<br>(8) | 0.35/na/na<br>(12)    | 0.42/15.5/2.7<br>(14)§ |                        |                        |                        |
| #14/M/26 (S)                               | 1.21/18.2/4.6               | 1.44/na/na<br>(3)                         | 2.17/17.9/4.3<br>(8) | 0.39/na/na<br>(12)    | 0.36/18.9/4.4<br>(14)  | 0.50/na/na<br>(16)     | 1.3/17.4/3.9<br>(20)§  |                        |

|              |               |                      |                      |                       |                        |                        |                        |                      |
|--------------|---------------|----------------------|----------------------|-----------------------|------------------------|------------------------|------------------------|----------------------|
| #15/M/69 (S) | 1.04/19.2/3.9 | 0.86/na/na<br>(3)    | 0.28/20.1/3.3<br>(4) | 0.55/na/na<br>(5)     | 1.15/21.4/2.9<br>(14)§ | 1.64/17.2/3.5<br>(163) |                        |                      |
| #16/M/84 (D) | 0.74/13.2/2.8 | 0.28/na/na<br>(2)    | 0.41/na/na<br>(7)    | 1.63/14.2/2.8<br>(9)  | 0.73/na/na<br>(14)     | 0.33/7.5/1.7<br>(16)   | 0.64/na/na<br>(18)     | 0.17/8.2/1.9<br>(21) |
| #17/M/77 (S) | 0.74/14.3/3.3 | 0.54/na/na<br>(2)    | 0.29/16.4/2.8<br>(4) | 0.82/na/na<br>(7)     | 2.44/15.7/3.2<br>(13)§ | 2.27/na/na<br>(182)    |                        |                      |
| #18/M/56 (S) | 0.62/18.2/4.1 | 0.29/na/na<br>(2)    | 0.29/16.9/3.8<br>(4) | 0.56/na/na<br>(6)     | 1.10/15.8/3.1<br>(9)§  |                        |                        |                      |
| #19/M/61 (S) | 0.81/17.3/3.8 | 0.34/na/na<br>(4)    | 0.26/19.7/3.4<br>(6) | 0.25/22.2/2.5<br>(11) | 0.72/na/na<br>(12)     | 0.75/na/na<br>(22)     | 0.97/19.5/2.9<br>(40)§ |                      |
| #20/M/74 (S) | 0.92/18.2/2.6 | 0.26/18.7/1.9<br>(3) | 1.07/na/na<br>(5)    | 1.04/20.6/2.5<br>(10) | 3.40/na/na<br>(14)     | 2.71/23.9/2.8<br>(20)  | 1.8/20.3/3.1<br>(28)§  |                      |
| #21/M/66 (S) | 1.45/16.9/5.1 | 0.26/na/na<br>(4)    | 0.15/14.6/4.5<br>(6) | 0.89/na/na<br>(10)    | 1.92/20.8/3.8<br>(18)  | 1.72/na/na<br>(26)     | 2.24/16.7/3.2<br>(40)§ | 3.9/14.2/nd<br>(170) |
| #22/F/86 (S) | 0.68/16.2/2.1 | 0.78/na/na<br>(2)    | 0.38/14.2/2.8<br>(5) | 0.41/na/na<br>(9)     | 0.55/16.1/3.3<br>(12)§ |                        |                        |                      |
| #23/M/68 (S) | 1.27/17.6/4.2 | 0.67/na/na<br>(3)    | 0.11/16.9/3.6<br>(5) | 0.25/na/na<br>(10)    | 0.65/na/na<br>(14)     | 1.87/18.1/4<br>(20)§   |                        |                      |
| #24/M/71 (S) | 0.41/18.1/3.7 | 0.54/na/na<br>(3)    | 0.21/15.7/3<br>(6)   | 0.53/na/na<br>(10)    | 0.63/12.7/4<br>(16)§   | 0.8/13.4/4.3<br>(228)  |                        |                      |
| #25/M/77 (D) | 0.66/16.0/2.8 | 0.39/na/na<br>(2)    | 0.11/13.2/2.1<br>(5) |                       |                        |                        |                        |                      |
| #26/M/64 (D) | 0.73/17.2/2.5 | 0.39/16.8/2.4<br>(1) | 0.53/na/na<br>(3)    | 0.12/14.3/1.6<br>(5)  |                        |                        |                        |                      |
| #27/M/65 (D) | 0.63/19.3/4.2 | 0.52/na/na<br>(2)    | 0.34/na/na<br>(4)    | 0.19/18.2/3.4<br>(6)  |                        |                        |                        |                      |

Legend: TSH reference range = 0.4-5.0 mU/L; FT4 reference range = 11.5-24.5 pmol/l; FT3 reference range = 2.9-7.1 pmol/l, na= not assessed;  
§=discharge
