# Supplementary material
Source: PubMed Central journal article supplement (PMC9494333)
Supplement: eje-20-1391-supplementary_table_3.pdf [file eje-20-1391-supplementary_table_3.pdf]

**Supplemental Table 3:** univariate (top panel) and multivariate (bottom panel) analysis of the variables associated with mortality. Significant variables are highlighted in bold.

| Parameter                                          | Deceased<br>(N) | Survivors<br>(N) | Patients<br>included (N) | P<br>(Fisher exact test) |
|----------------------------------------------------|-----------------|------------------|--------------------------|--------------------------|
| <b>Age &gt;65</b>                                  | <b>26/5</b>     | <b>42/43</b>     | <b>115</b>               | <b>0.0004</b>            |
| Smoking                                            | 2/18            | 5/67             | 92                       | NS                       |
| Gender (male)                                      | 22/8            | 62/23            | 115                      | NS                       |
| BMI>30                                             | 3/21            | 21/47            | 91                       | NS                       |
| BMI>25                                             | 14/9            | 50/18            | 91                       | NS                       |
| Low TSH                                            | 11/19           | 28/57            | 115                      | NS                       |
| <b>Low FT3</b>                                     | <b>23/7</b>     | <b>23/62</b>     | <b>115</b>               | <b>&lt;0.0001</b>        |
| <b>Low FT4 and FT3</b>                             | <b>7/23</b>     | <b>5/80</b>      | <b>115</b>               | <b>0.01</b>              |
| Parkinson' disease                                 | 1/27            | 1/83             | 112                      | NS                       |
| Alzheimer's disease                                | 6/22            | 6/78             | 112                      | NS                       |
| Stroke                                             | 3/27            | 7/77             | 114                      | NS                       |
| <b>COPD</b>                                        | <b>6/24</b>     | <b>5/79</b>      | <b>114</b>               | <b>0.04</b>              |
| Pulmonary hypertension                             | 1/29            | 0/84             | 114                      | NS                       |
| <b>Atrial fibrillation</b>                         | <b>6/24</b>     | <b>5/79</b>      | <b>114</b>               | <b>0.04</b>              |
| Chronic congestive heart failure                   | 2/28            | 2/82             | 114                      | NS                       |
| Hypertension                                       | 22/8            | 51/33            | 114                      | NS                       |
| <b>Coronary heart disease</b>                      | <b>10/20</b>    | <b>12/72</b>     | <b>114</b>               | <b>0.03</b>              |
| Chronic kidney dysfunction                         | 3/27            | 3/80             | 113                      | NS                       |
| <b>Diabetes</b>                                    | <b>9/21</b>     | <b>11/73</b>     | <b>114</b>               | <b>0.05</b>              |
| <b>Severe respiratory dysfunction at admission</b> | <b>23/7</b>     | <b>40/43</b>     | <b>113</b>               | <b>0.01</b>              |
| COMPLICATIONS DURING HOSPITALIZATION               |                 |                  |                          |                          |
| <b>Liver dysfunction</b>                           | <b>8/18</b>     | <b>6/74</b>      | <b>106</b>               | <b>0.005</b>             |
| <b>Anaemia</b>                                     | <b>10/16</b>    | <b>12/68</b>     | <b>106</b>               | <b>0.02</b>              |
| <b>Disseminated Intravascular Coagulation</b>      | <b>3/23</b>     | <b>1/79</b>      | <b>106</b>               | <b>0.04</b>              |
| <b>Acute Kidney Injury</b>                         | <b>8/18</b>     | <b>1/78</b>      | <b>105</b>               | <b>&lt;0.0001</b>        |
| <b>Co-infections</b>                               | <b>17/8</b>     | <b>19/59</b>     | <b>103</b>               | <b>0.0002</b>            |

| <b>LOGISTIC REGRESSION (stepwise method)</b> |             |                |        |               |
|----------------------------------------------|-------------|----------------|--------|---------------|
| Stepwise method                              |             |                |        |               |
|                                              | Coefficient | Standard error | Wald   | P             |
| <b>Age &gt;65</b>                            | 1.5488      | 0.76166        | 4.1349 | <b>0.042</b>  |
| <b>Coronary heart disease</b>                | 2.11167     | 0.81194        | 6.7641 | <b>0.0093</b> |
| <b>Co-infections</b>                         | 1.86946     | 0.71709        | 6.7966 | <b>0.0091</b> |
| <b>Acute Kidney Injury</b>                   | 3.06714     | 1.22827        | 6.2357 | <b>0.0125</b> |
| <b>Low FT3</b>                               | 1.97812     | 0.71507        | 7.6527 | <b>0.0057</b> |

Legend: COPD: Chronic obstructive pulmonary disease
